# Supplementary material
Source: PubMed Central journal article supplement (PMC6615466)
Supplement: NIHMS1035431-supplement-Suppl_Table_1.pdf [file NIHMS1035431-supplement-Suppl_Table_1.pdf]

**Table 1S. Differences in Median D-dimer Values Between Cases and Controls at each Visit Leading up to an Ischemic Heart Disease Event among Peripheral Artery Disease Participants\***

| Timing of D-dimer measurement prior to the IHD <sup>†</sup> event | Number of cases and controls | Median and interquartile range for case participants (mg/L) | Median and interquartile range for control participants (mg/L) | P value | Number of cases and controls | Adjusted median and interquartile range for case participants (mg/L) | Adjusted median and interquartile range for control participants (mg/L) | Adjusted P value |
|-------------------------------------------------------------------|------------------------------|-------------------------------------------------------------|----------------------------------------------------------------|---------|------------------------------|----------------------------------------------------------------------|-------------------------------------------------------------------------|------------------|
| 2 months before                                                   | Cases=40<br>Controls=79      | 0.77(0.46 to 1.38)                                          | 0.63(0.36 to 1.32)                                             | 0.21    | cases=34<br>control=56       | 0.83(0.55 to 1.12)                                                   | 0.69(0.45 to 0.93)                                                      | 0.12             |
| 4 months before                                                   | Cases=36<br>Controls=71      | 0.68(0.45 to 1.44)                                          | 0.47(0.26 to 1.11)                                             | 0.017   | cases=34<br>control=56       | 0.72(0.52 to 0.95)                                                   | 0.54(0.39 to 0.71)                                                      | 0.014            |
| 6 months before                                                   | Cases=36<br>Controls=72      | 0.78(0.51 to 1.66)                                          | 0.50(0.26 to 1.03)                                             | 0.005   | cases=34<br>control=57       | 0.82(0.60 to 1.14)                                                   | 0.64(0.47 to 0.89)                                                      | 0.010            |
| 8 months before                                                   | Cases=29<br>Controls=58      | 0.82(0.51 to 1.48)                                          | 0.54(0.32 to 1.05)                                             | 0.028   | cases=27<br>control=47       | 0.76(0.58 to 1.00)                                                   | 0.63(0.48 to 0.82)                                                      | 0.13             |
| 10 months before                                                  | Cases=25<br>Controls=48      | 0.68(0.45 to 1.17)                                          | 0.51(0.30 to 0.93)                                             | 0.06    | cases=23<br>control=37       | 0.67(0.47 to 0.91)                                                   | 0.58(0.41 to 0.79)                                                      | 0.28             |
| 12 months before                                                  | Cases=19<br>Controls=38      | 0.76(0.45 to 1.12)                                          | 0.43(0.29 to 0.92)                                             | 0.20    | cases=18<br>control=29       | 0.63(0.46 to 0.87)                                                   | 0.55(0.40 to 0.76)                                                      | 0.51             |
| 14 months before                                                  | Cases=15<br>Controls=30      | 0.90(0.63 to 1.22)                                          | 0.67(0.35 to 1.09)                                             | 0.10    | cases=14<br>control=25       | 0.91(0.79 to 1.27)                                                   | 0.67(0.58 to 0.93)                                                      | 0.08             |
| 16 months before                                                  | Cases=11<br>Controls=22      | 0.71(0.46 to 1.37)                                          | 0.58(0.33 to 0.90)                                             | 0.22    | cases=10<br>control=18       | 0.87(0.62 to 1.22)                                                   | 0.57(0.40 to 0.80)                                                      | 0.007            |
| 18 months before                                                  | Cases=14<br>Controls=28      | 0.89(0.34 to 1.17)                                          | 0.58(0.32 to 0.95)                                             | 0.23    | cases=13<br>control=23       | 0.81(0.72 to 1.01)                                                   | 0.60(0.53 to 0.74)                                                      | 0.041            |

\* Adjusted model additionally adjusted for baseline dyslipidemia (HDL), baseline blood marker value and baseline comorbidities (Angina, MI, and CHF). Median based on original value & adjusted median based on GEE model using LOG values and assuming independence correlated error structure. P value based on GEE model using LOG transformed values and assuming independence correlated error structure. Adjusted model required participants having history of hypertension and also received treatment for hypertension at baseline and baseline blood drawn was not the only blood marker value available, which leads to the change number of cases and controls for the adjusted model.

<sup>†</sup> IHD- Ischemic Heart Disease
